# Supplementary material for: Impact of the COVID-19 pandemic on pediatric emergency department utilization for head injuries
Source: HighWire-hosted journal article supplement (doi:10.1136/jim-2021-002292), 2022-05-23
Supplement: jim-2021-002292supp001_data_supplement.pdf [file jim-2021-002292supp001_data_supplement.pdf]

**Supplemental:****Supplement 1.** Variables for Analysis

| <b>Variables</b>                    | <b>Explanation</b>                                           | <b>Type of Variable</b> |
|-------------------------------------|--------------------------------------------------------------|-------------------------|
| <b>Age</b>                          | EMR data                                                     | Categorical             |
| <b>Race</b>                         | EMR data                                                     | Categorical             |
| <b>Ethnicity</b>                    | EMR data                                                     | Categorical             |
| <b>Date of Encounter</b>            | EMR data                                                     | Categorical             |
| <b>Sex</b>                          | EMR data                                                     | Categorical             |
| <b>Census block group</b>           | Address data is available; This is used with the ADI below.  | Categorical             |
| <b>Zip code</b>                     | Address data is available                                    | Categorical             |
| <b>Area Deprivation Index (ADI)</b> | Measure of SES. Available at census block level and zip code | Categorical             |
| <b>Presenting Hospital</b>          | PED 1 vs PED 2 vs PED 3                                      | Categorical             |
| <b>Disposition</b>                  | Admission vs discharge home                                  | Binary                  |
| <b>Head CT</b>                      | Obtained vs not obtained                                     | Binary                  |
